# Supplementary material for: Sustainable use of water resources in a Wadi system facing climatechange impacts and growing groundwater demand
Source: Copernicus journal article supplement (doi:10.5194/hess-2020-599), 2021-01-13
Supplement: Supplementary file 1 [file hess-2020-599-supplement.pdf]

### i)NO-WUS Scenario

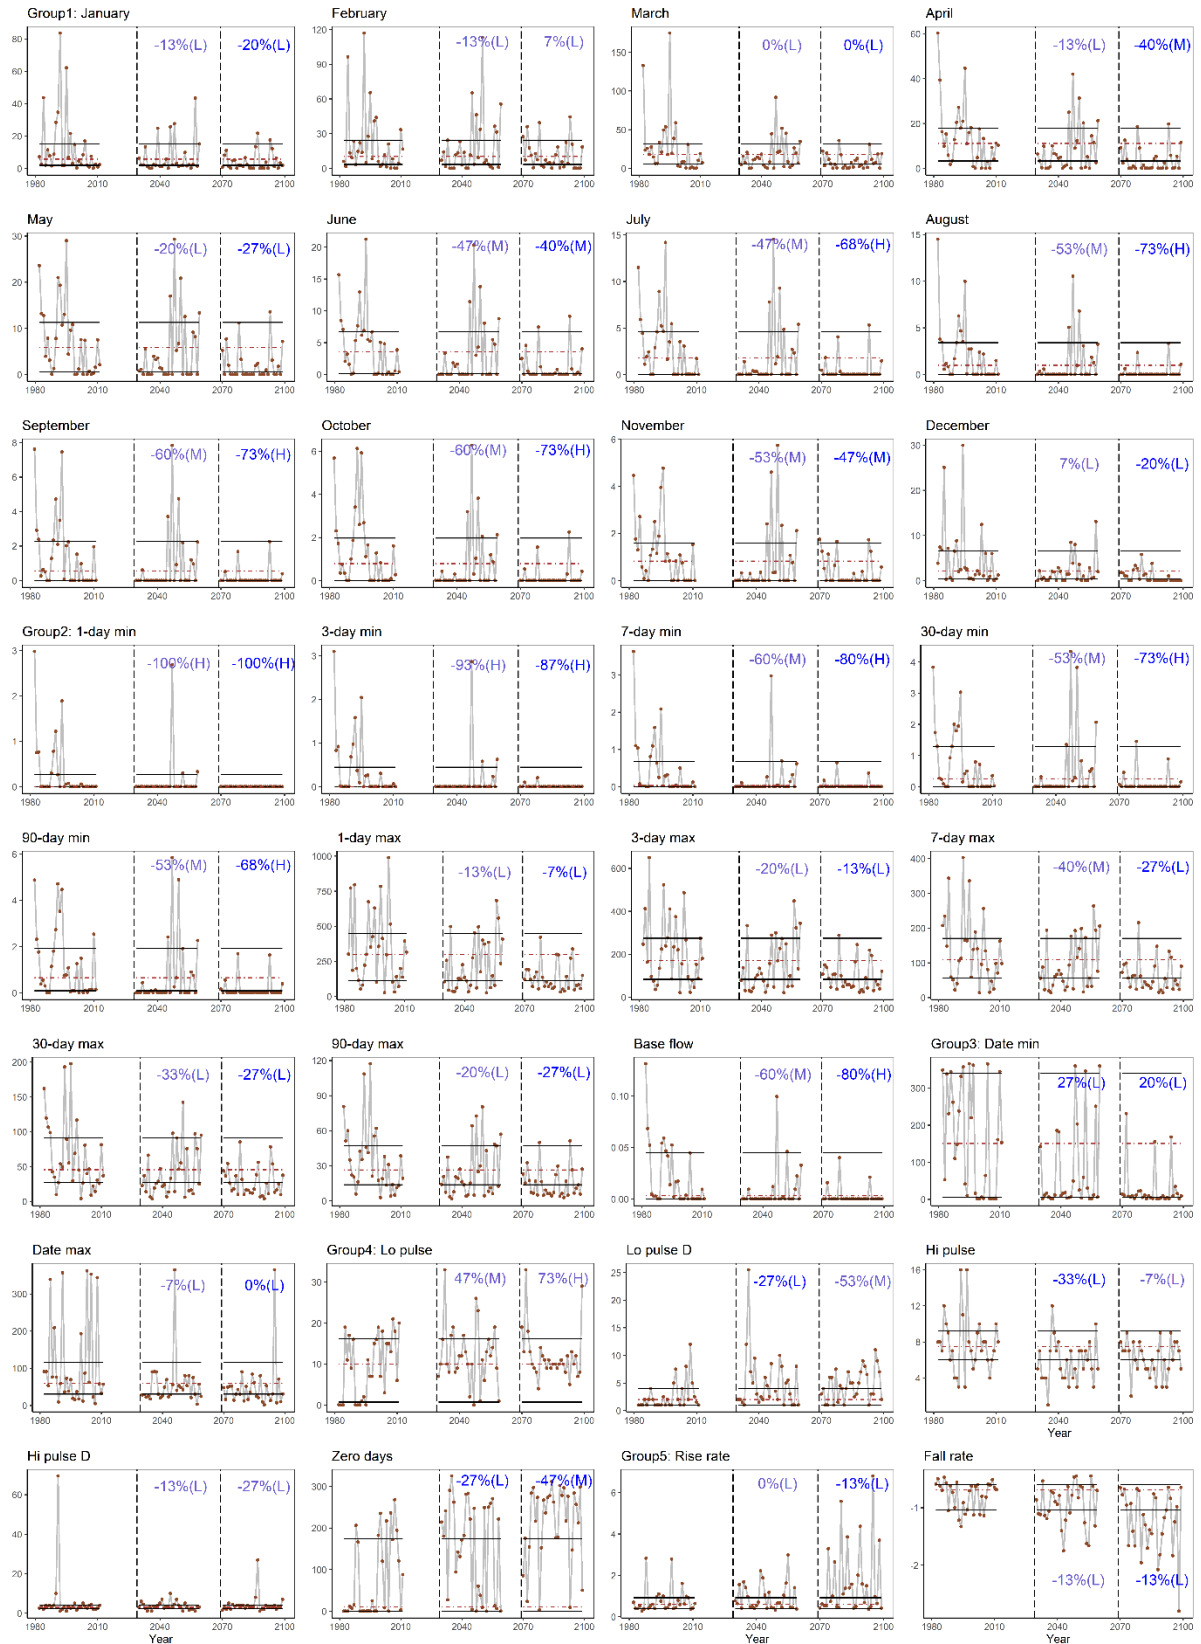

ii) Constant-WUS Scenario

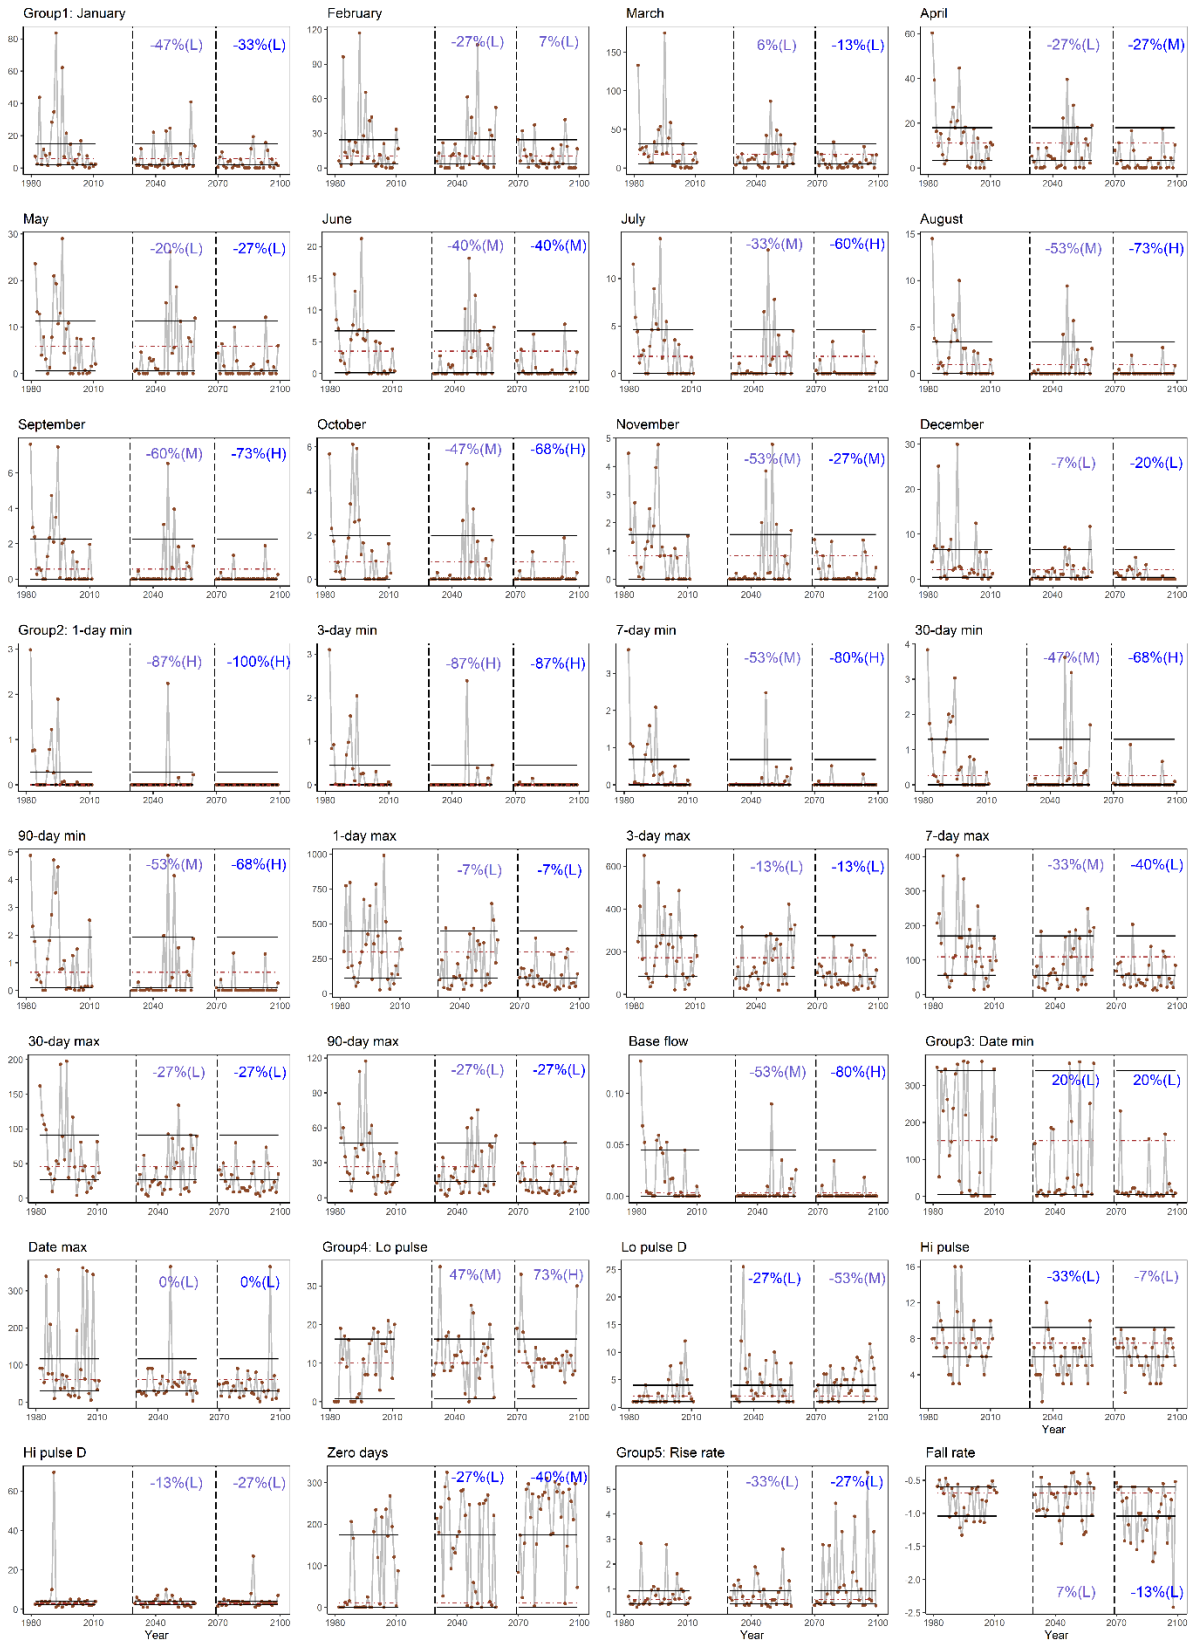

### iii) Projected-WUS Scenario

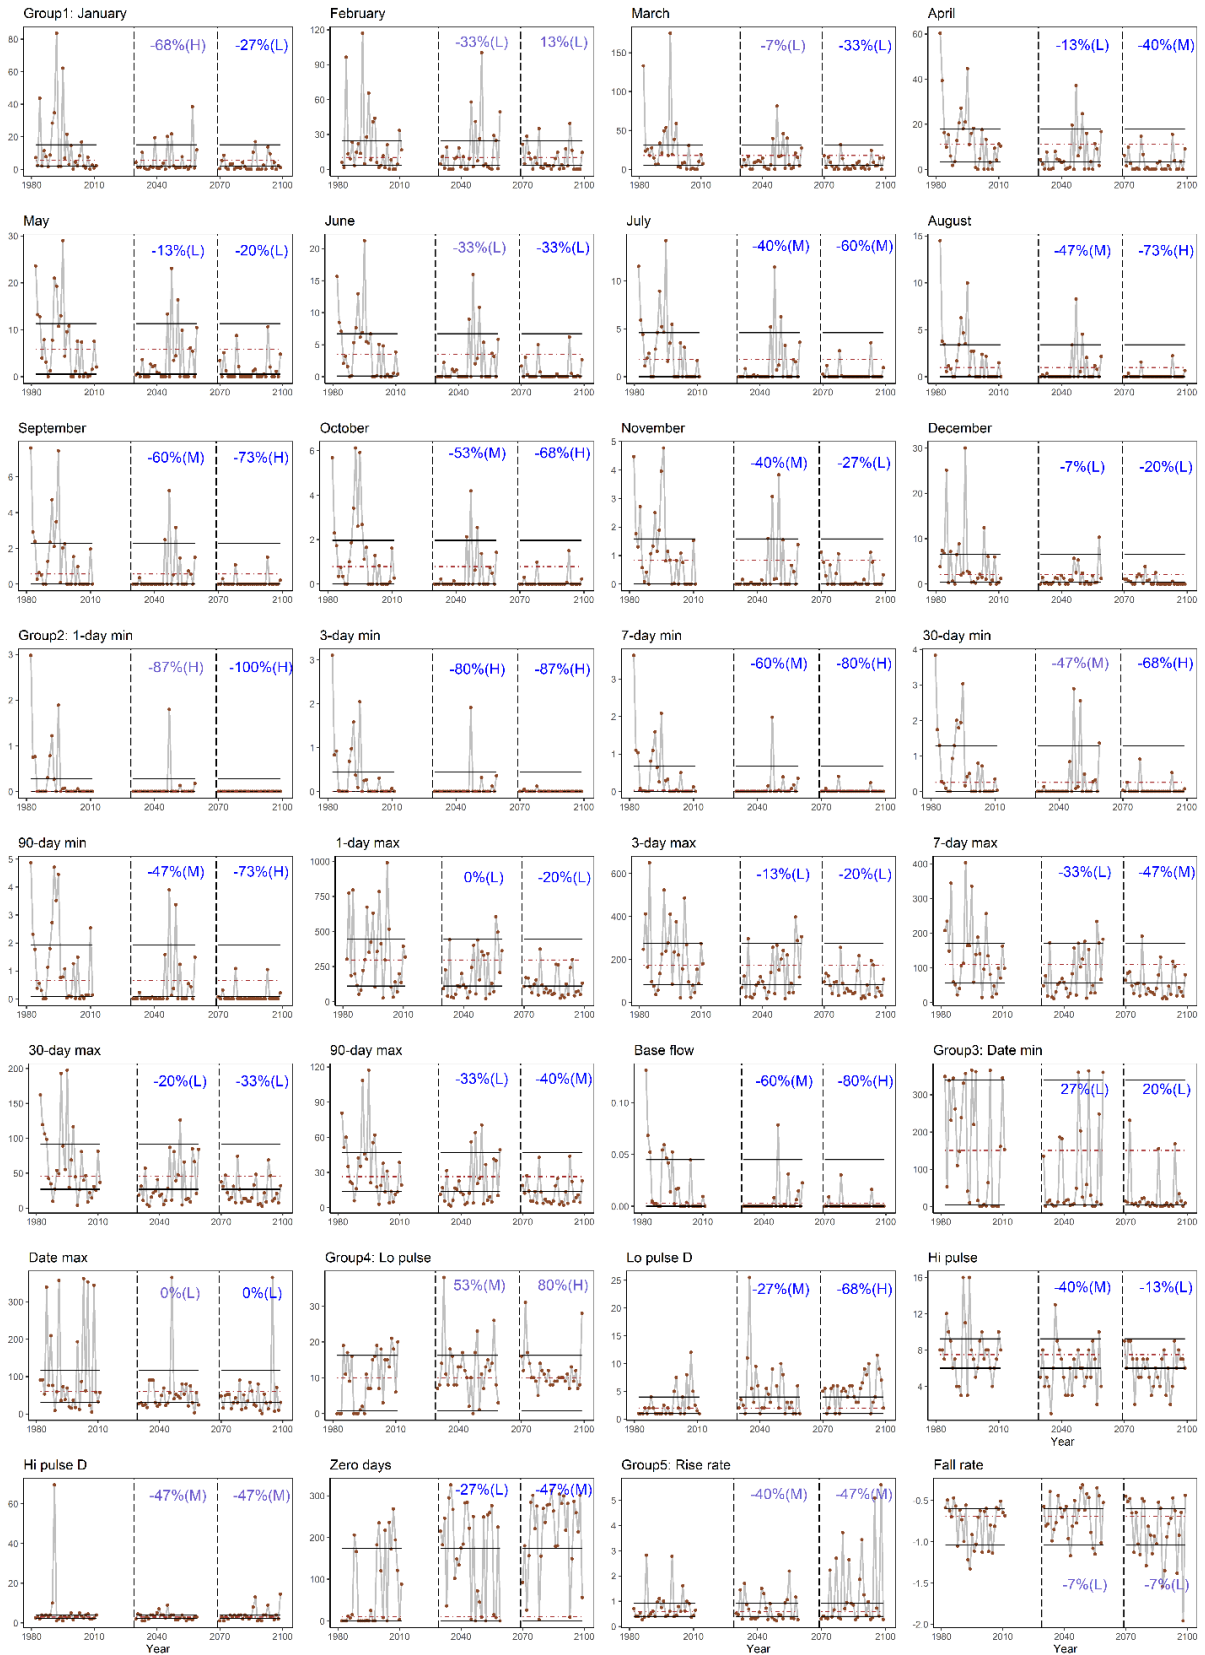

**Fig. S1: Alteration of 32 IHA (Indicators of Hydrologic Alteration) under three water use system scenarios in the future: No-WUS: the water use systems are not considered, Constant-WUS: the number of water use systems in the basin remains unaltered in the future, and Projected-WUS: the number of water use systems increases linearly with population growth. The red horizontal dashed line shows the median for the model setup period. The black horizontal lines represent the low and high-threshold of RVA (The Range of Variability Approach). The number indicates RVA deviation (%) in light blue and dark blue respectively for insignificant and significant changes.**

i)No-WUS Scenario

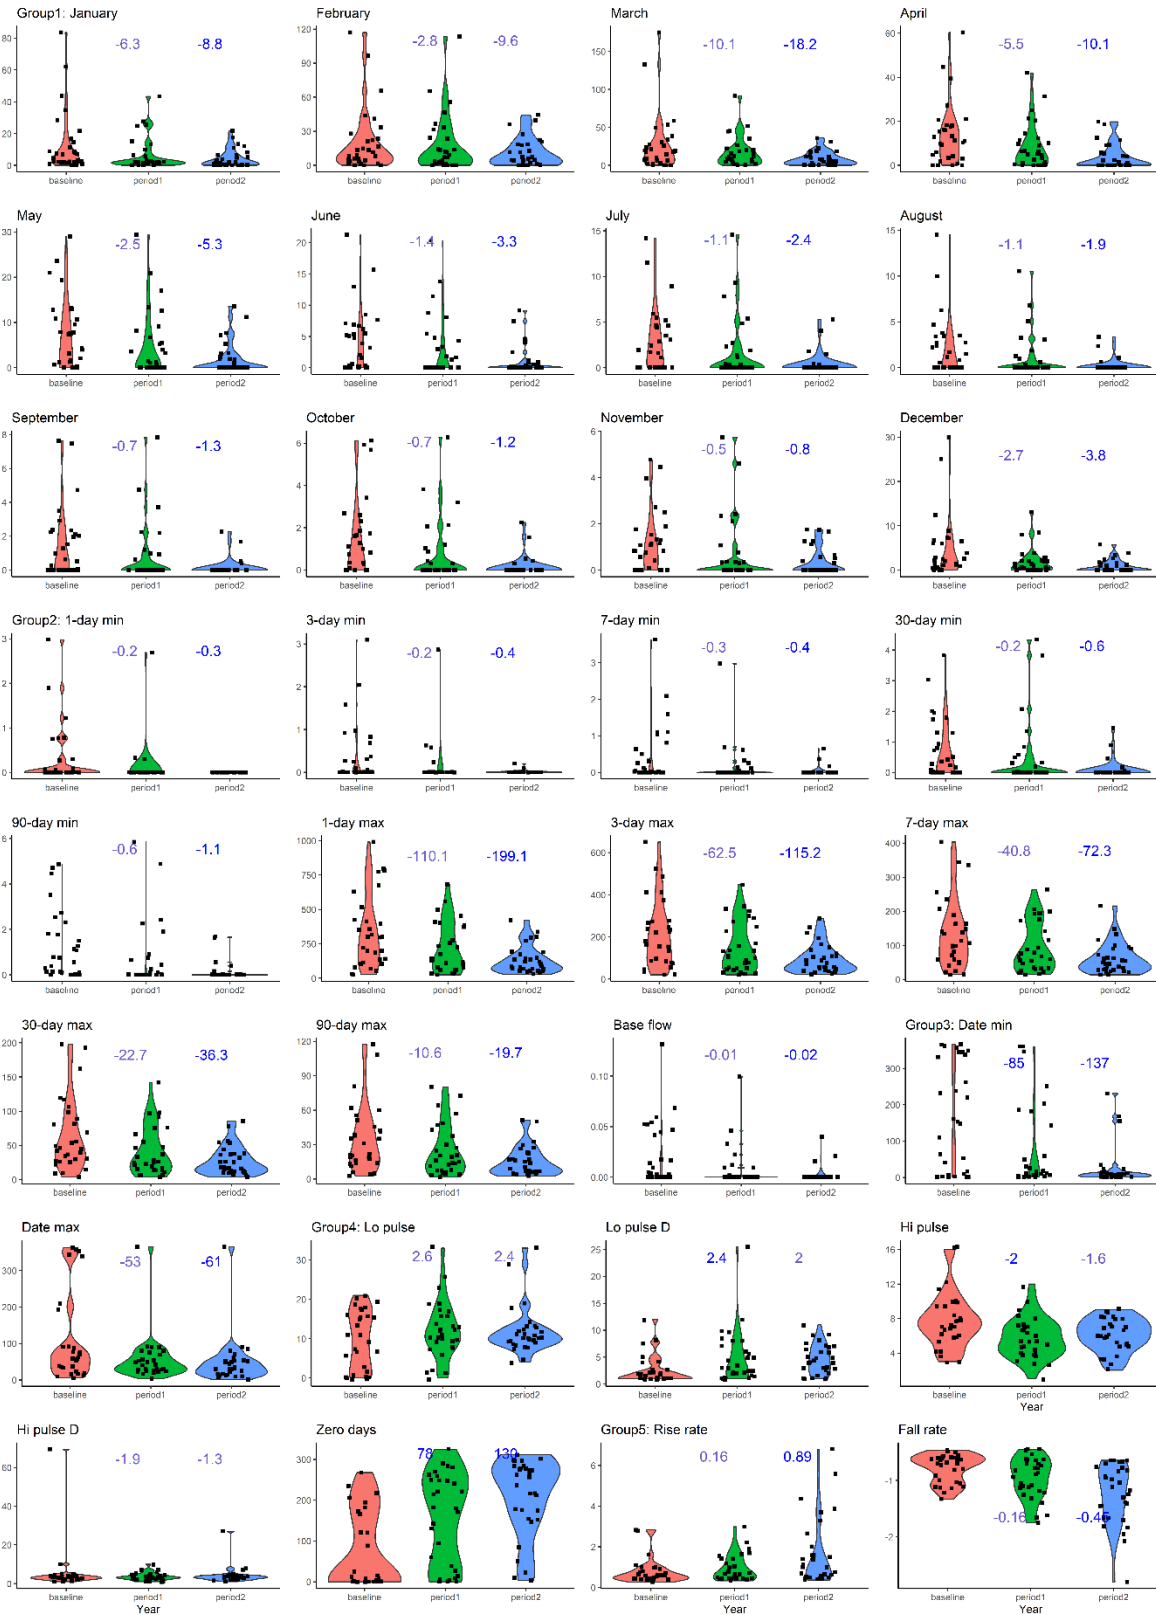

ii) Constant-WUS Scenario

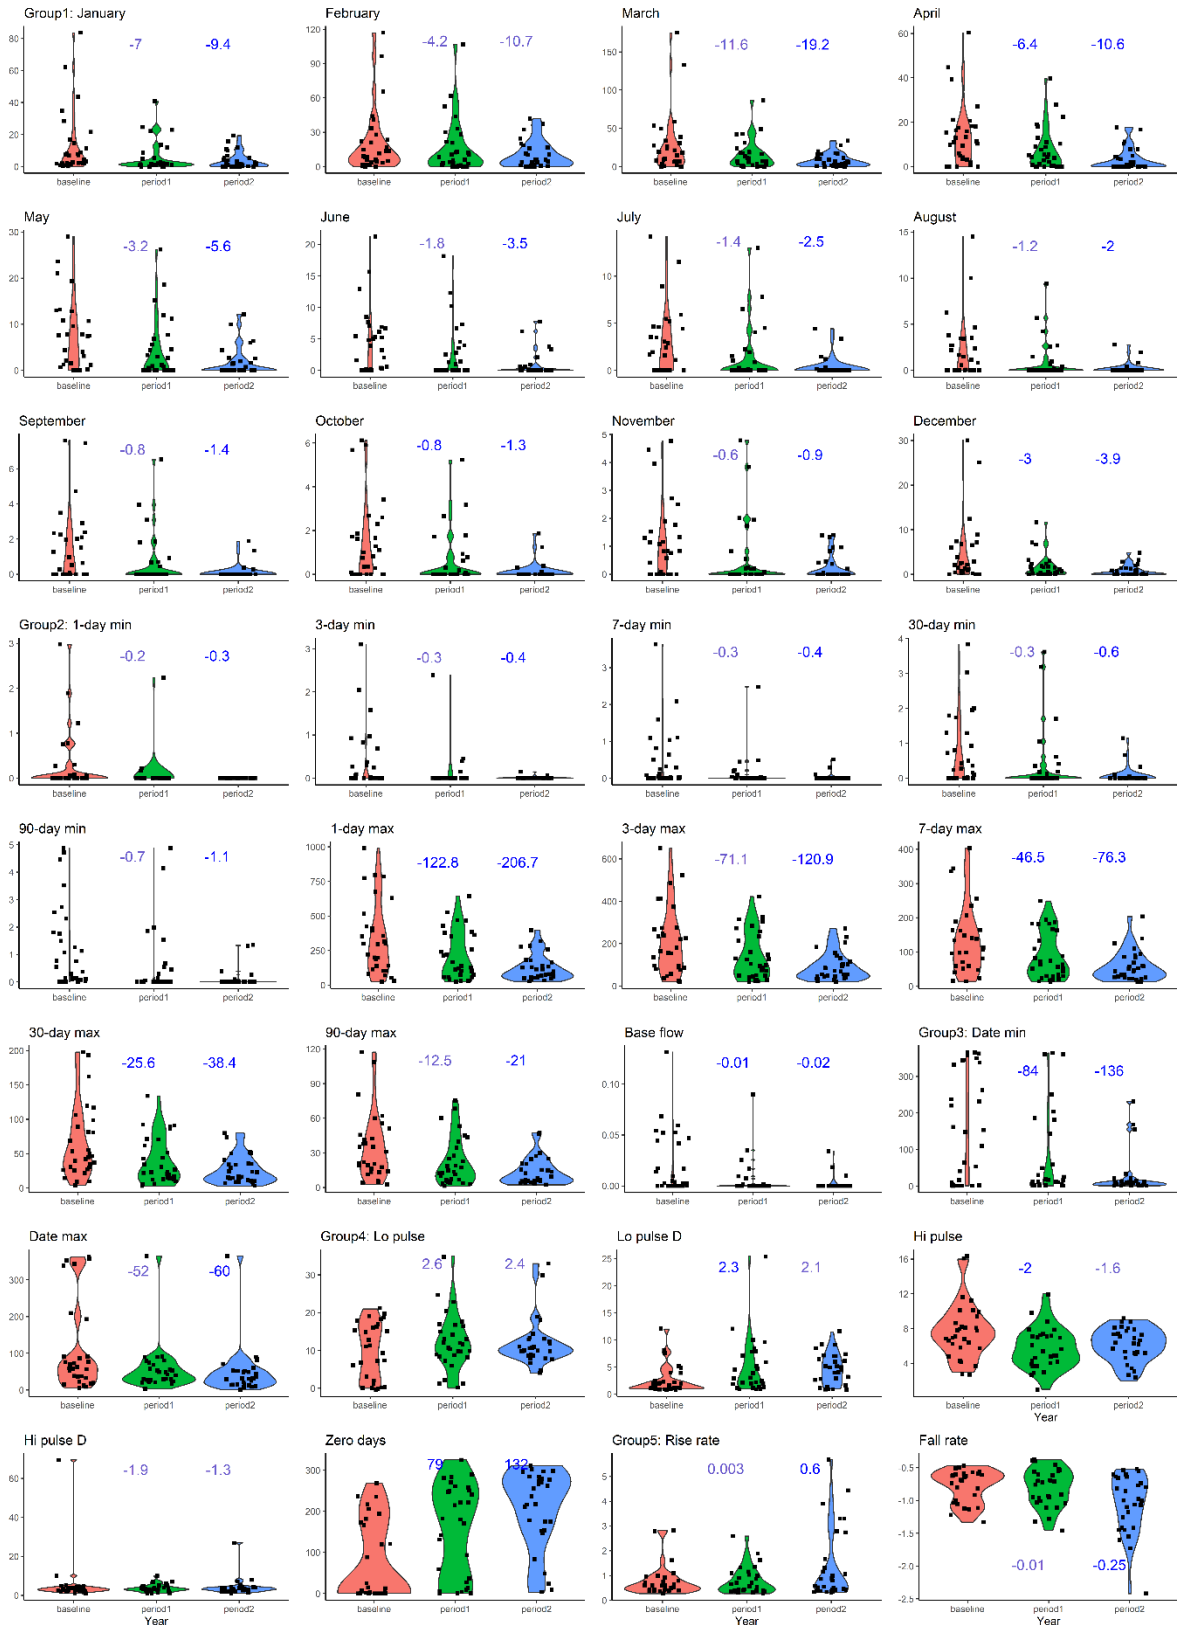

iii) Projected-WUS Scenario

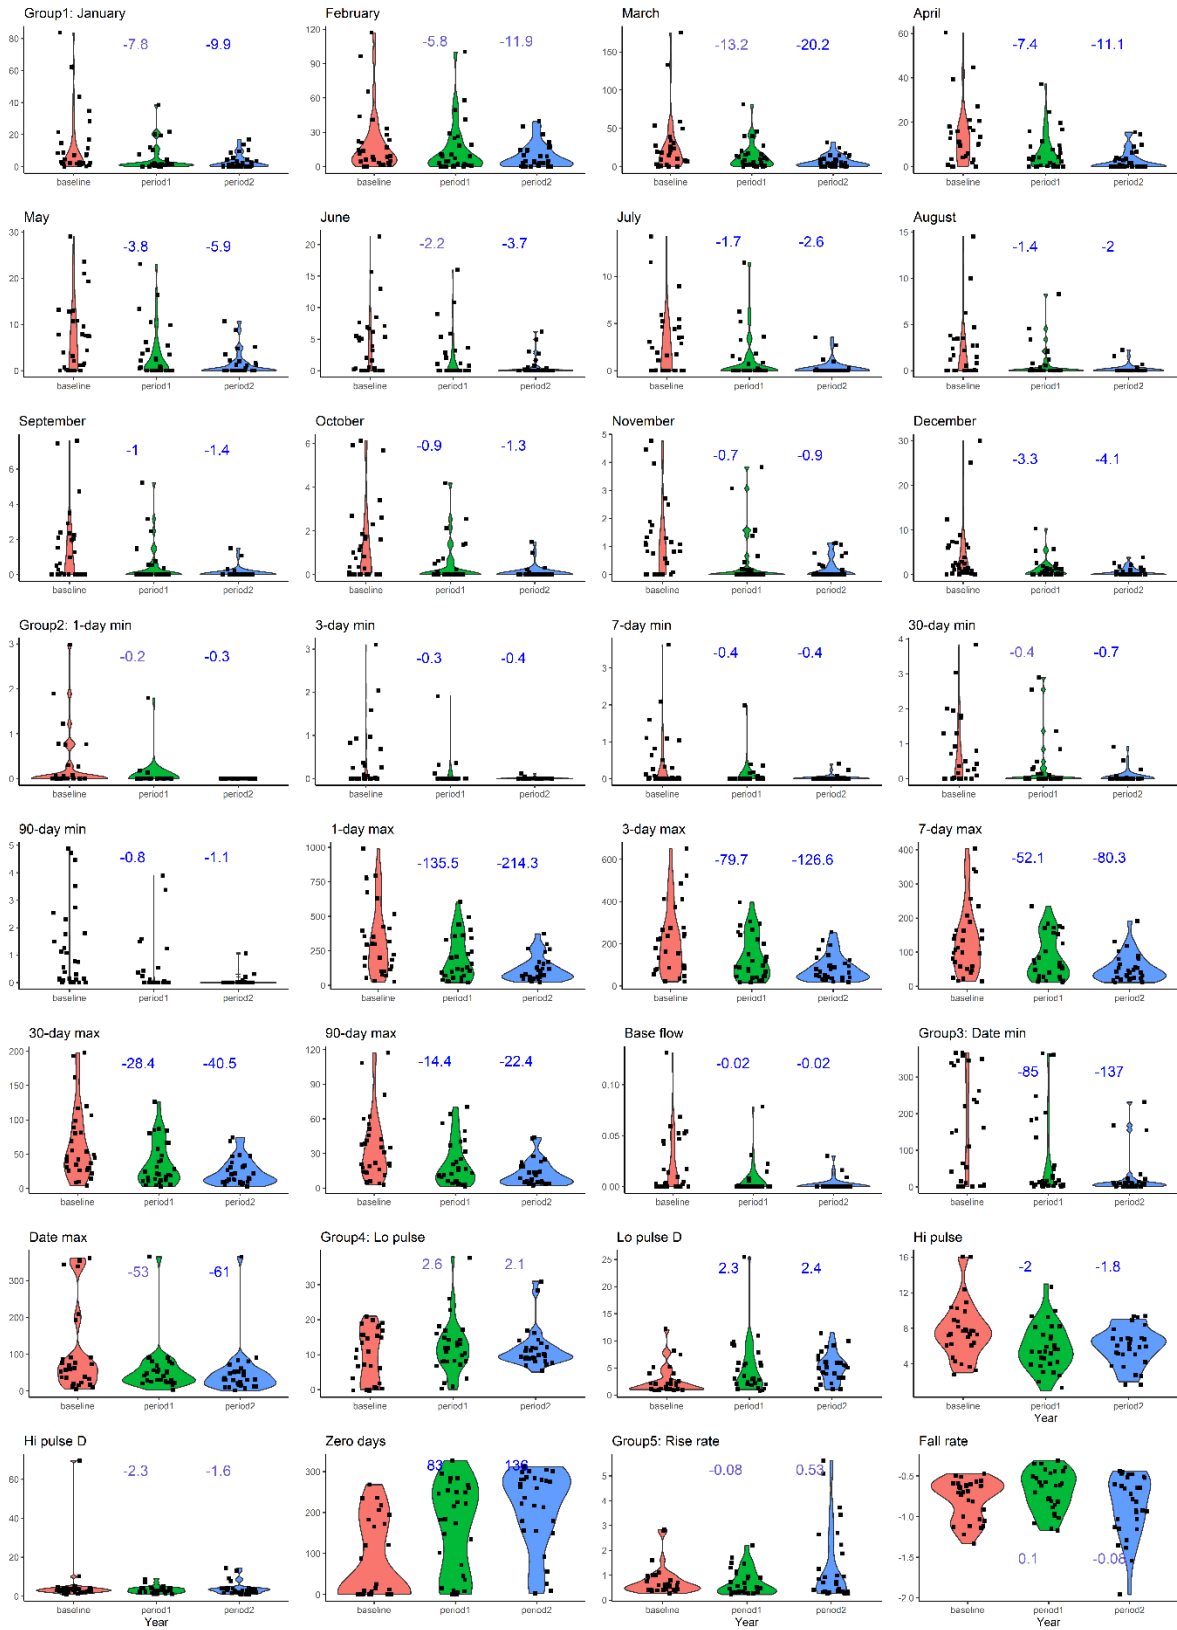

**Fig. S2: Distribution of annual values for each indicator under three water use system scenarios in the future: No-WUS: the water use systems are not considered, Constant-WUS: the number of water use systems in the basin remains unaltered in the future, and Projected-WUS: the number of water use systems increases linearly with population growth. Absolute changes are highlighted in light and dark blue respectively for insignificant and significant changes.**
